# Supplementary material for: Impact of Predator Exclusion and Habitat on Seroprevalence of New World Orthohantavirus Harbored by Two Sympatric Rodents within the Interior Atlantic Forest
Source: MDPI journal article supplement (doi:10.3390/v13101963), 2021-09-29
Supplement: s1 [file s1]

## Supplementary Tables

**Table S1.** The best-supported Huggins closed-capture models by species.

| Species                       | Session | Model <sup>a</sup> | AICc      | AICc Weight | Parameters | Deviance  | (-2)Log(L) |
|-------------------------------|---------|--------------------|-----------|-------------|------------|-----------|------------|
| <i>Akodon montensis</i>       | PreTrt  | M <sub>t</sub>     | 698.8093  | 0.99627     | 5          | 760.7257  | 688.7074   |
|                               | ON2016  | M <sub>b</sub>     | 711.8354  | 0.49619     | 2          | 653.0708  | 707.8127   |
| <i>Hylaeamys megacephalus</i> | PreTrt  | M <sub>0</sub>     | 259.4307  | 0.68924     | 1          | 237.7558  | 257.4131   |
|                               | ON2016  | M <sub>0</sub>     | 150.4944  | 0.67143     | 1          | 131.3512  | 148.4618   |
| <i>Oligoryzomys nigripes</i>  | PreTrt  | M <sub>t</sub>     | 110.3562  | 0.44100     | 5          | 84.2635   | 99.5967    |
|                               | ON2016  | M <sub>0</sub>     | 109.9696  | 0.72171     | 1          | 100.9016  | 107.9241   |
| All other species             | PreTrt  | M <sub>t</sub>     | 1240.6837 | 1.00000     | 5          | 1453.8901 | 1230.6264  |
|                               | ON2016  | M <sub>0</sub>     | 1056.2051 | 0.64236     | 1          | 1051.001  | 1054.2     |

<sup>a</sup>Capture and recapture probabilities were modeled as constant (M<sub>0</sub>), time varying (M<sub>t</sub>), or behavior varying (M<sub>b</sub>). These models were ranked by the AICc. Pre-treatment sampling (PreTrt) was performed during the winter from June-July 2016. The first post – predator removal session was performed at the beginning of the summer in October – November (ON2016).

**Table S2. *Akodon montensis* abundance.** Linear mixed effects model with treatment, session, and degradation level as fixed effects and abundance as the dependent variable. Results show model coefficient estimates ( $\beta$ ), the standard error of those estimates (SE), and associated p values.

| Effect <sup>a</sup> | Level      | Estimate ( $\beta$ ) | SE    | p      |
|---------------------|------------|----------------------|-------|--------|
| Treatment           | Yes        | -0.708               | 7.752 | 0.9355 |
| Session             | ON2016     | -3.184               | 4.564 | 0.5165 |
|                     | FM2017     | -3.272               | 9.495 | 0.7633 |
| Degradation Level   | Moderately | -0.392               | 9.495 | 0.9709 |
|                     | Most       | -0.708               | 7.752 | 0.9355 |

<sup>a</sup>For each effect, the reference group for each level are the levels not shown. The “Treatment” effect level is in reference to the control (unenclosed) grids. The “Session” effect level is in reference to the “PreTrt” session. The “Degradation level” effect is in reference to the least degraded grids.

**Table S3. *Hylaeamys megacephalus* abundance.** Linear mixed effects model with treatment, session, and degradation level as fixed effects and abundance as the dependent variable. Results show model coefficient estimates ( $\beta$ ), the standard error of those estimates (SE), and associated p values.

| Effect <sup>a</sup> | Level  | Estimate ( $\beta$ ) | SE    | p      |
|---------------------|--------|----------------------|-------|--------|
| Treatment           | Yes    | 0.656                | 3.265 | 0.8592 |
| Session             | ON2016 | -5.803               | 2.068 | 0.0377 |

| Effect <sup>a</sup> | Level      | Estimate ( $\beta$ ) | SE    | <i>p</i> |
|---------------------|------------|----------------------|-------|----------|
| Degradation Level   | FM2017     | 5.642                | 3.999 | 0.2937   |
|                     | Moderately | 4.738                | 3.999 | 0.3578   |
|                     | Most       | 0.656                | 3.265 | 0.8592   |

<sup>a</sup>For each effect, the reference group for each level are the levels not shown. The “Treatment” effect level is in reference to the control (unenclosed) grids. The “Session” effect level is in reference to the “PreTrt” session. The “Degradation level” effect is in reference to the least degraded grids.

**Table S4. *Oligoryzomys nigripes* abundance.** Linear mixed effects model with treatment and degradation level as fixed effects and abundance as the dependent variable. Session was not modeled as a fixed effect because in the PreTrt session, there were no captures on two out of the three experimental grids. Results show model coefficient estimates ( $\beta$ ), the standard error of those estimates (SE), and associated *p* values.

| Effect <sup>a</sup> | Level      | Estimate ( $\beta$ ) | SE    | <i>p</i> |
|---------------------|------------|----------------------|-------|----------|
| Treatment           | Yes        | 0.860                | 2.148 | 0.7277   |
| Degradation Level   | Moderately | 1.934                | 2.631 | 0.5387   |
|                     | Most       | 3.868                | 2.631 | 0.2793   |

<sup>a</sup>For each effect, the reference group for each level are the levels not shown. The “Treatment” effect level is in reference to the control (unenclosed) grids. The “Session” effect level is in reference to the “PreTrt” session. The “Degradation level” effect is in reference to the least degraded grids.
